# Supplementary material
Source: Springer Nature journal article supplement (https://www.springermedizin.de/resource/supplementary/12974_2007_98_MOESM6_ESM.pdf/9600766)

**A)**

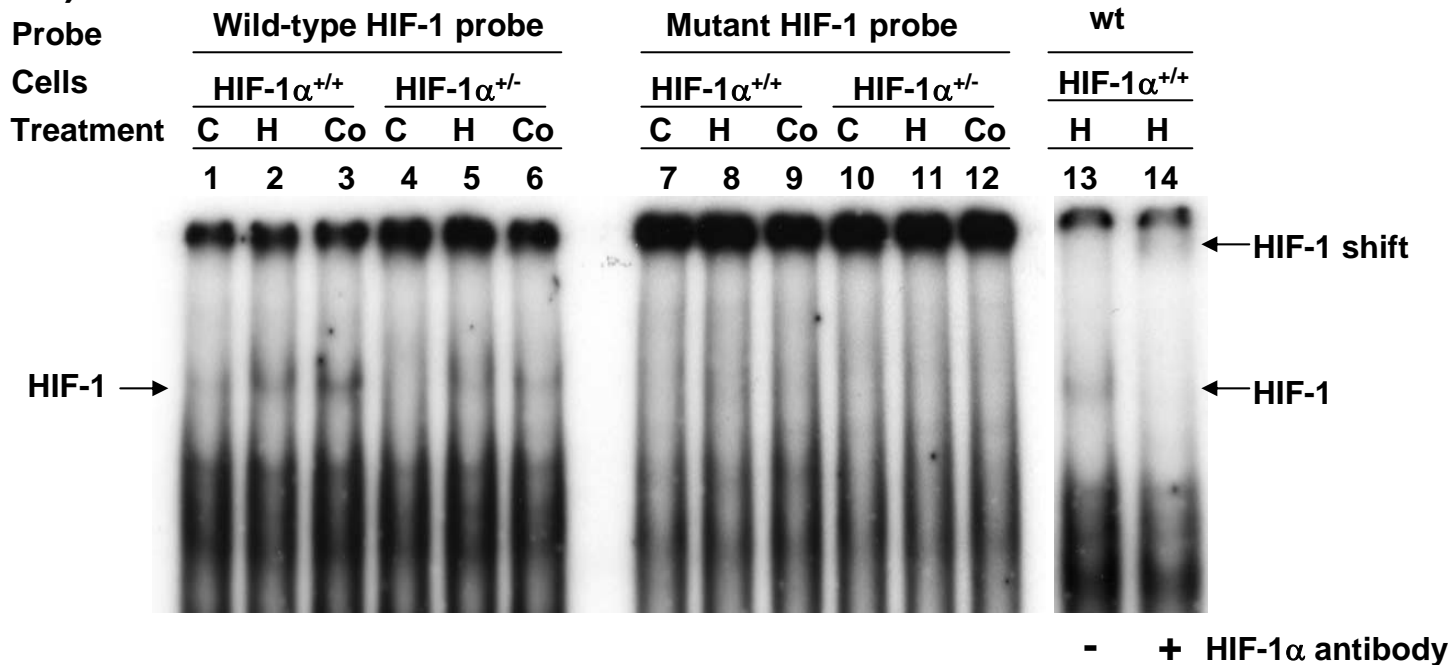

**B)**

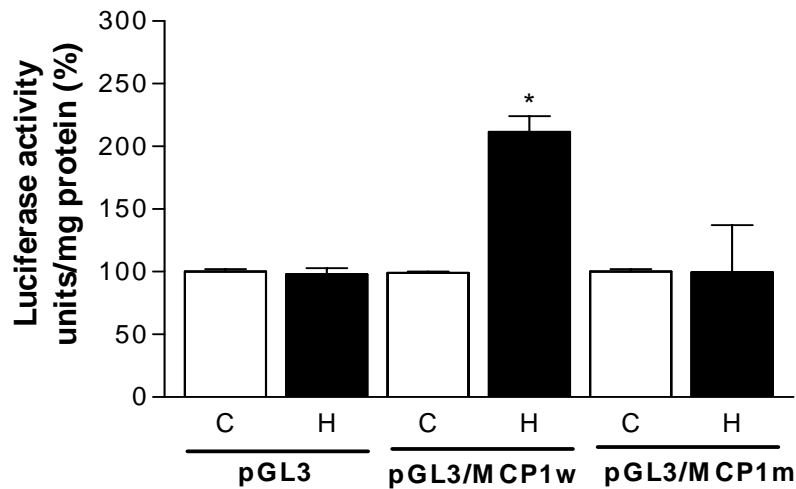

Supplement: MOESM6 [file 9600766]
